# Supplementary material
Source: Springer Nature journal article supplement (https://www.springermedizin.de/resource/supplementary/12889_2013_6294_MOESM3_ESM.pdf/9498618)

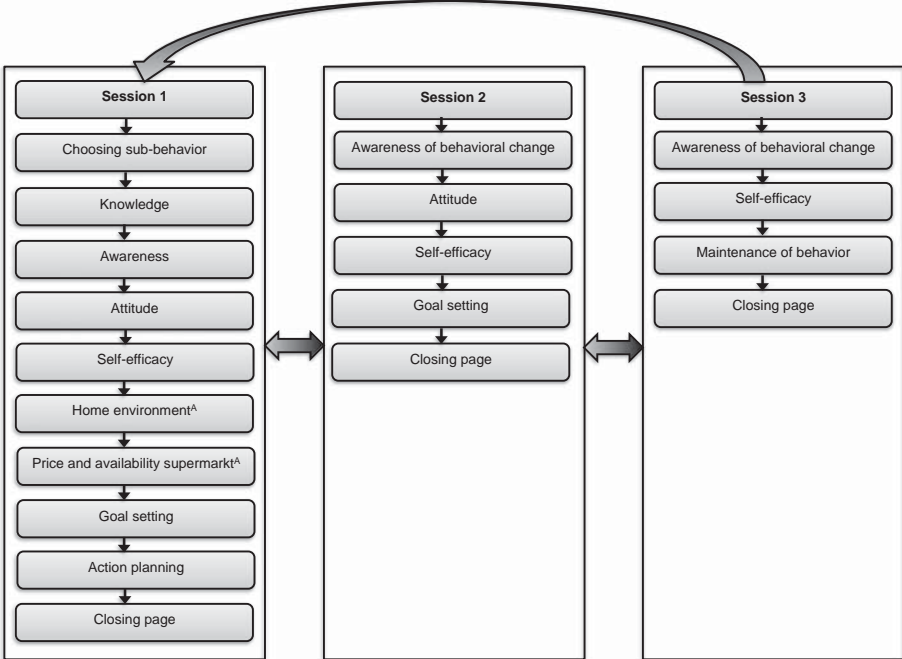

<sup>A</sup>: Plus version only

Supplement: MOESM3 [file 9498618]
